# Supplementary material for: Template-Free Fabrication of Refractive Index Tunable Polysiloxane Coating Using Homogeneous Embedding Strategy: Application in High-Power Laser System
Source: MDPI journal article supplement (doi:10.3390/nano10020381), 2020-02-22
Supplement: s1 [file s1]

# Supplementary materials

## Template-Free Fabrication of Refractive Index Tunable Polysiloxane Coating Using Homogeneous Embedding Strategy: Application in High-Power Laser System

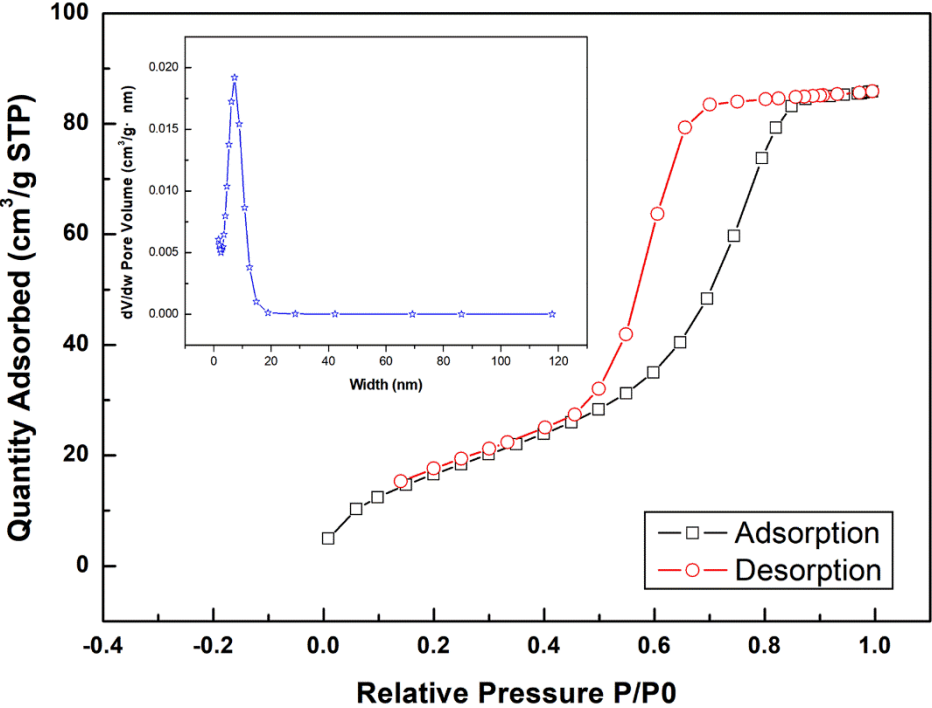

Figure S1. Nitrogen adsorption-desorption isotherm image of MSNs.

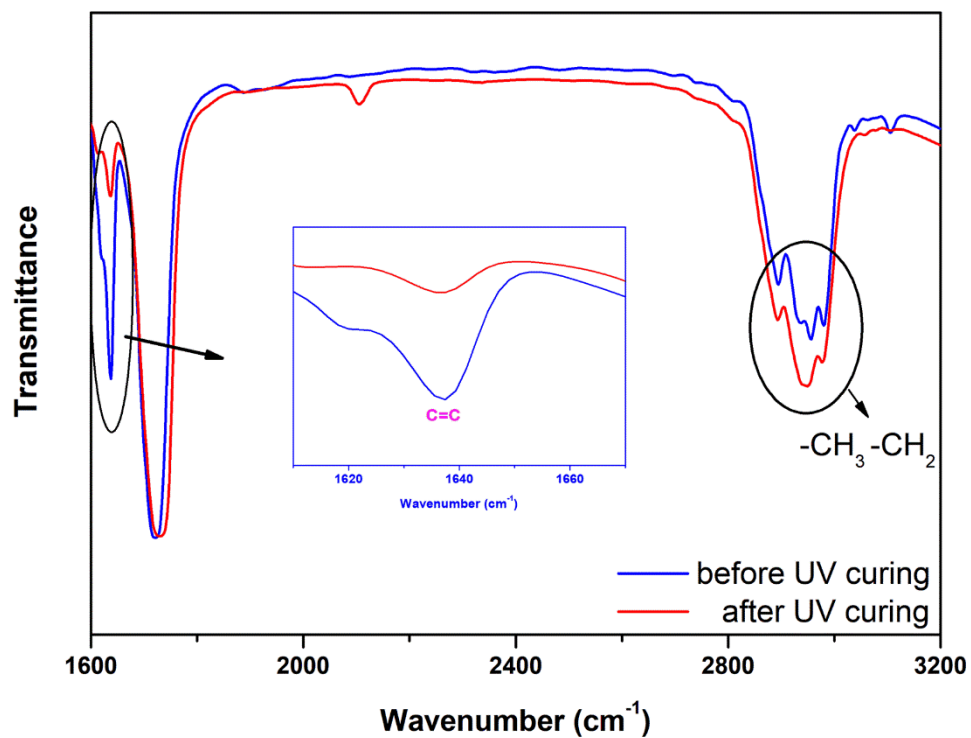

Figure S2. FTIR spectra of coating before and after UV curing.

Table S1. Specific Surface Area data of typical MSN.

|                                                                                             |                            |
|---------------------------------------------------------------------------------------------|----------------------------|
| Single point surface area at $p/p^\circ = 0.299522363$ :                                    | 61.5860 m <sup>2</sup> /g  |
| BET Surface Area:                                                                           | 67.8628 m <sup>2</sup> /g  |
| t-Plot external surface area:                                                               | 90.8852 m <sup>2</sup> /g  |
| BJH Adsorption cumulative surface area of pores<br>between 1.7000 nm and 300.0000 nm width: | 85.2113 m <sup>2</sup> /g  |
| BJH Desorption cumulative surface area of pores<br>between 1.7000 nm and 300.0000 nm width: | 115.0010 m <sup>2</sup> /g |
